# Supplementary figures and images for: Associations between Degenerative Lumbar Scoliosis Structures and Pain Distribution in Adults with Chronic Low Back Pain
Source: MDPI journal article supplement (doi:10.3390/healthcare11162357), 2023-08-21

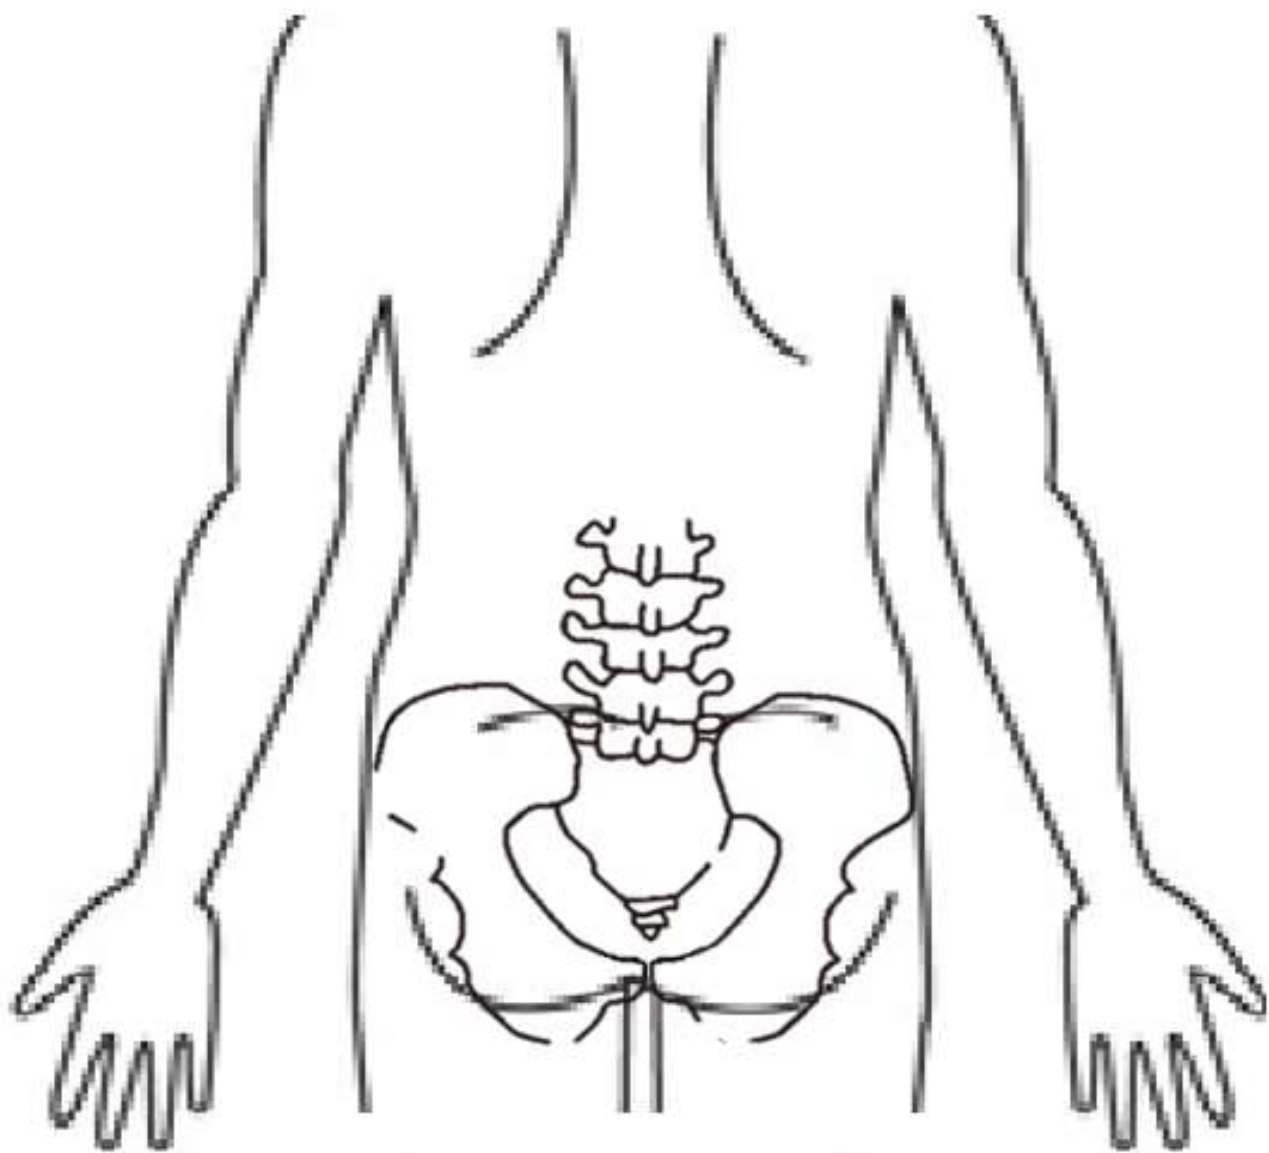

Left

Right

Supplement: s1 [file s1]
